# Supplementary material for: Precipitation projections using a spatiotemporally distributed method: a case study in the Poyang Lake watershed based on the MRI-CGCM3
Source: Copernicus journal article supplement (doi:10.5194/hess-23-1649-2019), 2019-03-21
Supplement: Supplementary file 1 [file hess-23-1649-2019-supplement.zip]

## Data and code descriptions

The input data includes precipitation and temperature data. The data consists of simulations from GCMs and observation. The data descriptions and sources are listed in table 1.

The spatiotemporally distributed downscaling model includes three parts: (1) Up-sampling GCMs simulations, (2) Constructing relations between the GCMs simulations and local observations, (3) Correcting the GCMs simulations. The code of the three parts for precipitations and temperatures are list in table2. As the observations from National Meteorological Information Center (<http://data.cma.cn/>) is required not to be shared. So the data is not provided.

Table 1. Data descriptions. The pcg presents the precipitation while the tm presents the temperature.

| Data Classifications | Simulations from MRI-CGCMs                                                                      |                                                                | Observations                                          |
|----------------------|-------------------------------------------------------------------------------------------------|----------------------------------------------------------------|-------------------------------------------------------|
|                      | Historical Data                                                                                 | Future Data                                                    |                                                       |
| Time                 | 1961-2005                                                                                       | 2006-2100                                                      | 1961-2005                                             |
| Data Files           | PcpSimulation1961_2005 folder,<br>TmSimulation1961_2005 folder                                  | PcpSimulation2006_2100 folder,<br>TmSimulation2006_2010 folder | PcpObs folder,<br>TmObs folder                        |
| Data Sources         | <a href="https://esgf-node.llnl.gov/search/cmip5/">https://esgf-node.llnl.gov/search/cmip5/</a> |                                                                | <a href="http://data.cma.cn/">http://data.cma.cn/</a> |

Table 2. The codes for different procedures.

| Procedures | Code Sources      |
|------------|-------------------|
| Part 1     | part1_code folder |
| Part 2     | part1_code folder |
| Part 3     | part2_code folder |
