# Supplementary material for: Precipitation projections using a spatiotemporally distributed method: a case study in the Poyang Lake watershed based on the MRI-CGCM3
Source: Copernicus journal article supplement (doi:10.5194/hess-23-1649-2019), 2019-03-21
Supplement: Supplementary file 2 [file hess-23-1649-2019-supplement.zip]

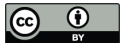

## *Supplement of*

# **Precipitation projections using a spatiotemporally distributed method: a case study in the Poyang Lake watershed based on the MRI-CGCM3**

**Ling Zhang et al.**

*Correspondence to:* Jianzhong Lu ([lujzhong@whu.edu.cn](mailto:lujzhong@whu.edu.cn))

- [hess-23-1649-2019-supplement-title-page.pdf](#)
- Data and Codes
  - Data and code descriptions.pdf
  - PcpSimulation1961\_2005
    - \* [pr\\_Amon\\_MRI-CGCM3\\_historical\\_r1i1p1\\_185001-200512.nc](#)
  - PcpSimulation2006\_2100
    - \* [pr\\_Amon\\_MRI-CGCM3\\_rcp85\\_r1i1p1\\_200601-210012.nc](#)
  - TmSimulation1961\_2005
    - \* [tas\\_Amon\\_MRI-CGCM3\\_historical\\_r1i1p1\\_185001-200512.nc](#)
  - TmSimulation2006\_2100
    - \* [tas\\_Amon\\_MRI-CGCM3\\_rcp85\\_r1i1p1\\_200601-210012.nc](#)
  - part1\_code
    - \* [UpSampling.py](#)
  - part2\_code
    - \* [CreatBiasCoefficientsForGCMs.py](#)
  - part3\_code
    - \* [BiasCorrection.py](#)

The copyright of individual parts of the supplement might differ from the CC BY 4.0 License.
